# Supplementary material for: Seroprevalence of Toxocara spp. in Pregnant Women: A Systematic Review and Meta-Analysis
Source: Hindawi journal article supplement (doi:10.1155/2024/1943353), 2024-04-20
Supplement: f1 [file 1943353.f1.pdf]

**Supplementary Table 1.** Main characteristics of all eligible studies reporting prevalence of *Toxocara* spp. in pregnant women.

| First author               | Publication year | Age range or mean range | Study design    |
|----------------------------|------------------|-------------------------|-----------------|
| Santos et al.              | 2015             | 13 to 34                | Cross-sectional |
| Pereira et al.             | 2016             | Unknown                 | Cross-sectional |
| De Oliveira Azevedo et al. | 2021             | 14 to 43                | Cross-sectional |
| Cong et al.                | 2014             | 28.39 (range 18–43)     | Cross-sectional |
| SL YU et al.               | 2020             | 26.5                    | Cross-sectional |
| Mohamed Issa               | 2006             | 18 to 32                | Cross-sectional |
| Papavasiliopoulos et al.   | 2016             | Unknown                 | Cross-sectional |
| Raissi et al.              | 2018             | 30.2                    | Cross-sectional |
| Murad et al.               | 2021             | 18 to 39                | Cross-sectional |
| Sohrabi et al.             | 2022             | 20 to 50                | Cross-sectional |
| Ikotun et al.              | 2020             | 31.1 (range 20–43)      | Cross-sectional |

| Type of sample | Diagnostic method       | Antibodies | Country | Province/city   |
|----------------|-------------------------|------------|---------|-----------------|
| Serum          | ELISA                   | IgG        | Brazil  | Rio Grande do S |
| Serum          | ELISA                   | IgG        | Brazil  | Brasília        |
| Serum          | ELISA                   | IgG        | Brazil  | Brazil          |
| Serum          | ELISA                   | IgG        | China   | Weihai and Qin  |
| Serum          | ELISA                   | IgG        | China   | Yuhang District |
| Serum          | Exo-antigen (TEX)-ELISA | IgG        | Egypt   | Unknown         |
| Serum          | ELISA                   | IgG        | Greece  | Athens          |
| Serum          | ELISA                   | IgG        | Iran    | Ilam            |
| Serum          | ELISA                   | IgG        | Iran    | Duhok           |
| Serum          | ELISA                   | IgG        | Iran    | Mashhad         |
| Serum          | Western blot            | IgG        | Nigeria | Osun state      |

| Continent     | Sample size | Infected by <i>Toxocara</i> | QA | contact with dog (yes) | sample |
|---------------|-------------|-----------------------------|----|------------------------|--------|
| South America | 280         | 18                          |    | 10                     | 49     |
| South America | 311         | 23                          |    | 9                      |        |
| South America | 280         | 58                          |    | 10                     | 147    |
| Asia          | 990         | 91                          |    | 9                      |        |
| Asia          | 235         | 57                          |    | 9                      |        |
| Africa        | 28          | 12                          |    | 6                      |        |
| Europe        | 25          | 4                           |    | 6                      |        |
| Asia          | 189         | 40                          |    | 10                     | 65     |
| Asia          | 150         | 18                          |    | 10                     |        |
| Asia          | 162         | 19                          |    | 9                      |        |
| Africa        | 413         | 382                         |    |                        |        |

Positive

|    | contact with dog (No) | sample : Positive | contact with cat ( | positive |
|----|-----------------------|-------------------|--------------------|----------|
| 3  | 231                   | 15                |                    |          |
| 36 | 75                    | 22                | 46                 | 9        |
| 29 | 124                   | 1                 |                    |          |

contact with cat ( positive

contact with dog and cat (ye positive

contact with dog and positive

176

49

20

2

130

16

37

8

44

0

|                   |          |                  |          |    |
|-------------------|----------|------------------|----------|----|
| Onychophagia(yes) | positive | Onychophagia(no) | positive |    |
|                   | 84       | 7                | 196      | 11 |
|                   | 134      | 39               | 88       | 19 |

Consumption of raw meat(yes) positive

Consumption of raw meat(no) positive

62

20

160

38

32

3

118

15

Pets ownership(yes)

positive

Pets ownership(no)

posotive

24

3

126

15



Hands washing before meals(\ positive

Hands washing before meals(r positive

115

14

35

4

Tap water drinking(yes)      positive

Tap water drinking(no)      positive

122

15

28

3

| Contact with sand(yes) positive | Contact with sand(no) positive |
|---------------------------------|--------------------------------|
| 87                              | 5                              |
| 53                              | 17                             |
|                                 | 193                            |
|                                 | 13                             |
|                                 | 169                            |
|                                 | 41                             |
